# Supplementary material for: Remarkable distinctions in the heat-induced phase transition processes of two poly(2-isopropyl-2-oxazoline)-based mixed aqueous solutions
Source: Royal Society of Chemistry journal article supplement (doi:10.1039/c5sm00186b), 2015-01-01
Supplement: c5sm00186b1.pdf [file c5sm00186b1.pdf]

## Supporting Information to

# Remarkable Distinctions in the Heat-induced Phase Transition Processes of Two Poly(2-isopropyl-2-oxazoline)-based Mixed Aqueous Solutions

Tianjiao Li, Hui Tang, Peiyi Wu\*

The State Key Laboratory of Molecular Engineering of Polymers Collaborative Innovation Center of Polymers and Polymer Composite Materials and Department of Macromolecular Science, Laboratory of Advanced Materials, Fudan University, Shanghai 200433, People's Republic of China.

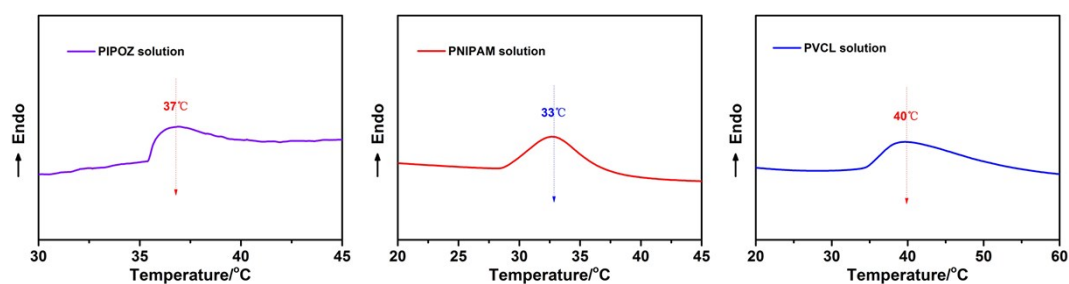

**Fig. S1** DSC curves of neat PIPOZ, PNIPAM and PVCL solutions in D2O upon heating at a rate of 1 °C min<sup>-1</sup>.
